# Supplementary material for: Network pharmacology and computer-aided drug design to explored potential targets of Lianhua Qingwen and Qingfei Paidu decoction for COVID-19
Source: Front Pharmacol. 2022 Sep 23;13:1013428. doi: 10.3389/fphar.2022.1013428 (PMC9540507; doi:10.3389/fphar.2022.1013428)
Supplement: Supplementary file 1 [file Table1.XLS]

## Sheet: Sheet1
Active compounds of LHQW
wogonin
20(S)-dammar-24-ene-3β,20-diol-3-acetate
(2R,3R,4S)-4-(4-hydroxy-3-methoxy-phenyl)-7-methoxy-2,3-dimethylol-tetralin-6-ol
(3R,4R)-3,4-bis[(3,4-dimethoxyphenyl)methyl]oxolan-2-one
(+)-pinoresinol monomethyl ether
PHILLYRIN
ACon1_001697
(+)-pinoresinol monomethyl ether-4-D-beta-glucoside_qt
3beta-Acetyl-20,25-epoxydammarane-24alpha-ol
Mairin
FORSYTHINOL
(-)-Phillygenin
β-amyrin acetate
hyperforin
adhyperforin
Lactucasterol
Onjixanthone I
beta-sitosterol
kaempferol
arctiin
luteolin
bicuculline
quercetin
Fortunellin
acacetin
Linarin
Diosmetin
sitosterol
naringenin
aloe-emodin
eriodictyol
Genkwanin
Glycyrol
l-SPD
Machiline
Phaseol
Licochalcone B
Ziziphin_qt
liquiritin
(+)-catechin
estrone
Glabridin
Stigmasterol
Spinasterol
11,14-eicosadienoic acid
CLR
(6Z,10E,14E,18E)-2,6,10,15,19,23-hexamethyltetracosa-2,6,10,14,18,22-hexaene
Diisooctyl succinate
gondoic acid
EUPATIN
Mutatochrome
Physciondiglucoside
Procyanidin B-5,3'-O-gallate
rhein
Sennoside E_qt
Torachrysone-8-O-beta-D-(6'-oxayl)-glucoside
Toralactone
Emodin-1-O-beta-D-glucopyranoside
Sennoside D_qt
Daucosterol_qt
palmidin A
gallic acid-3-O-(6'-O-galloyl)-glucoside
(-)-catechin
Inermine
DFV
Jaranol
Medicarpin
isorhamnetin
Lupiwighteone
7-Methoxy-2-methyl isoflavone
formononetin
Calycosin
(2S)-2-[4-hydroxy-3-(3-methylbut-2-enyl)phenyl]-8,8-dimethyl-2,3-dihydropyrano[2,3-f]chromen-4-one
euchrenone
glyasperin B
glyasperin F
Glyasperin C
Isotrifoliol
(E)-1-(2,4-dihydroxyphenyl)-3-(2,2-dimethylchromen-6-yl)prop-2-en-1-one
kanzonols W
(2S)-6-(2,4-dihydroxyphenyl)-2-(2-hydroxypropan-2-yl)-4-methoxy-2,3-dihydrofuro[3,2-g]chromen-7-one
Semilicoisoflavone B
Glepidotin A
Glepidotin B
Phaseolinisoflavan
Glypallichalcone
8-(6-hydroxy-2-benzofuranyl)-2,2-dimethyl-5-chromenol
licochalcone G
3-(2,4-dihydroxyphenyl)-8-(1,1-dimethylprop-2-enyl)-7-hydroxy-5-methoxy-coumarin
Licoricone
Gancaonin A
Gancaonin B
licorice glycoside E
3-(3,4-dihydroxyphenyl)-5,7-dihydroxy-8-(3-methylbut-2-enyl)chromone
5,7-dihydroxy-3-(4-methoxyphenyl)-8-(3-methylbut-2-enyl)chromone
2-(3,4-dihydroxyphenyl)-5,7-dihydroxy-6-(3-methylbut-2-enyl)chromone
Glycyrin
Licocoumarone
Licoisoflavone
Licoisoflavone B
licoisoflavanone
shinpterocarpin
(E)-3-[3,4-dihydroxy-5-(3-methylbut-2-enyl)phenyl]-1-(2,4-dihydroxyphenyl)prop-2-en-1-one
licopyranocoumarin
3,22-Dihydroxy-11-oxo-delta(12)-oleanene-27-alpha-methoxycarbonyl-29-oic acid
Glyzaglabrin
Glabranin
Glabrene
Glabrone
1,3-dihydroxy-9-methoxy-6-benzofurano[3,2-c]chromenone
1,3-dihydroxy-8,9-dimethoxy-6-benzofurano[3,2-c]chromenone
Eurycarpin A
glycyroside
(-)-Medicocarpin
Sigmoidin-B
(2R)-7-hydroxy-2-(4-hydroxyphenyl)chroman-4-one
(2S)-7-hydroxy-2-(4-hydroxyphenyl)-8-(3-methylbut-2-enyl)chroman-4-one
Isoglycyrol
Isolicoflavonol
HMO
1-Methoxyphaseollidin
Quercetin der.
3'-Hydroxy-4'-O-Methylglabridin
licochalcone a
3'-Methoxyglabridin
2-[(3R)-8,8-dimethyl-3,4-dihydro-2H-pyrano[6,5-f]chromen-3-yl]-5-methoxyphenol
Inflacoumarin A
icos-5-enoic acid
Kanzonol F
6-prenylated eriodictyol
7,2',4'-trihydroxy－5-methoxy-3－arylcoumarin
7-Acetoxy-2-methylisoflavone
8-prenylated eriodictyol
gadelaidic acid
Vestitol
Gancaonin G
Gancaonin H
Licoagrocarpin
Glyasperins M
Glycyrrhiza flavonol A
Licoagroisoflavone
18α-hydroxyglycyrrhetic acid
Odoratin
Xambioona
dehydroglyasperins C
Diop
patchoulan 1,12-diol
pachypodol
5-Hydroxy-7,4'-dimethoxyflavanon
irisolidone
phenanthrone
quercetin 7-O-尾-D-glucoside
Acanthoside B
3,23-dihydroxy-12-oleanen-28-oic acid
kaempferol-3-O-α-L-rhamnoside
Tamarixetin
Mandenol
Ethyl linolenate
phytofluene
Eriodyctiol (flavanone)
(-)-(3R,8S,9R,9aS,10aS)-9-ethenyl-8-(beta-D-glucopyranosyloxy)-2,3,9,9a,10,10a-hexahydro-5-oxo-5H,8H-pyrano[4,3-d]oxazolo[3,2-a]pyridine-3-carboxylic acid_qt
secologanic dibutylacetal_qt
beta-carotene
ZINC03978781
Chryseriol
kryptoxanthin
4,5'-Retro-.beta.,.beta.-Carotene-3,3'-dione, 4',5'-didehydro-
5-hydroxy-7-methoxy-2-(3,4,5-trimethoxyphenyl)chromone
7-epi-Vogeloside
Caeruloside C
Centauroside_qt
Ioniceracetalides B_qt
XYLOSTOSIDINE
dinethylsecologanoside
(2R)-5,7-dihydroxy-2-(4-hydroxyphenyl)chroman-4-one
11-Hydroxynumantenine
Harmonyl
ZINC00035529
Flavidin
Albaspidin AA
Isoramanone
1-methyl-2-nonacosyl-4-quinolone
Ruvoside_qt
C09747
leucopelargonidin
Herbacetin
Resivit
delphinidin
Supraene
24-Ethylcholest-4-en-3-one
poriferast-5-en-3beta-ol
taxifolin
campest-5-en-3beta-ol
Pectolinarigenin
(+)-Leucocyanidin
Truflex OBP
