# Supplementary material for: Network pharmacology and computer-aided drug design to explored potential targets of Lianhua Qingwen and Qingfei Paidu decoction for COVID-19
Source: Front Pharmacol. 2022 Sep 23;13:1013428. doi: 10.3389/fphar.2022.1013428 (PMC9540507; doi:10.3389/fphar.2022.1013428)
Supplement: Supplementary file 2 [file Table2.XLS]

## Sheet: Sheet1
Active compounds of QFPD
leucopelargonidin
Herbacetin
Resivit
kaempferol
delphinidin
quercetin
luteolin
beta-sitosterol
Stigmasterol
(+)-catechin
Mandenol
Supraene
24-Ethylcholest-4-en-3-one
poriferast-5-en-3beta-ol
Diosmetin
naringenin
taxifolin
campest-5-en-3beta-ol
eriodictyol
Genkwanin
Pectolinarigenin
(+)-Leucocyanidin
Truflex OBP
Inermine
DFV
Mairin
Glycyrol
Jaranol
Medicarpin
isorhamnetin
sitosterol
Lupiwighteone
7-Methoxy-2-methyl isoflavone
formononetin
Calycosin
(2S)-2-[4-hydroxy-3-(3-methylbut-2-enyl)phenyl]-8,8-dimethyl-2,3-dihydropyrano[2,3-f]chromen-4-one
euchrenone
glyasperin B
glyasperin F
Glyasperin C
Isotrifoliol
(E)-1-(2,4-dihydroxyphenyl)-3-(2,2-dimethylchromen-6-yl)prop-2-en-1-one
kanzonols W
(2S)-6-(2,4-dihydroxyphenyl)-2-(2-hydroxypropan-2-yl)-4-methoxy-2,3-dihydrofuro[3,2-g]chromen-7-one
Semilicoisoflavone B
Glepidotin A
Glepidotin B
Phaseolinisoflavan
Glypallichalcone
8-(6-hydroxy-2-benzofuranyl)-2,2-dimethyl-5-chromenol
Licochalcone B
licochalcone G
3-(2,4-dihydroxyphenyl)-8-(1,1-dimethylprop-2-enyl)-7-hydroxy-5-methoxy-coumarin
Licoricone
Gancaonin A
Gancaonin B
licorice glycoside E
3-(3,4-dihydroxyphenyl)-5,7-dihydroxy-8-(3-methylbut-2-enyl)chromone
5,7-dihydroxy-3-(4-methoxyphenyl)-8-(3-methylbut-2-enyl)chromone
2-(3,4-dihydroxyphenyl)-5,7-dihydroxy-6-(3-methylbut-2-enyl)chromone
Glycyrin
Licocoumarone
Licoisoflavone
Licoisoflavone B
licoisoflavanone
shinpterocarpin
(E)-3-[3,4-dihydroxy-5-(3-methylbut-2-enyl)phenyl]-1-(2,4-dihydroxyphenyl)prop-2-en-1-one
liquiritin
licopyranocoumarin
3,22-Dihydroxy-11-oxo-delta(12)-oleanene-27-alpha-methoxycarbonyl-29-oic acid
Glyzaglabrin
Glabridin
Glabranin
Glabrene
Glabrone
1,3-dihydroxy-9-methoxy-6-benzofurano[3,2-c]chromenone
1,3-dihydroxy-8,9-dimethoxy-6-benzofurano[3,2-c]chromenone
Eurycarpin A
glycyroside
(-)-Medicocarpin
Sigmoidin-B
(2R)-7-hydroxy-2-(4-hydroxyphenyl)chroman-4-one
(2S)-7-hydroxy-2-(4-hydroxyphenyl)-8-(3-methylbut-2-enyl)chroman-4-one
Isoglycyrol
Isolicoflavonol
HMO
1-Methoxyphaseollidin
Quercetin der.
3'-Hydroxy-4'-O-Methylglabridin
licochalcone a
3'-Methoxyglabridin
2-[(3R)-8,8-dimethyl-3,4-dihydro-2H-pyrano[6,5-f]chromen-3-yl]-5-methoxyphenol
Inflacoumarin A
icos-5-enoic acid
Kanzonol F
6-prenylated eriodictyol
7,2',4'-trihydroxy－5-methoxy-3－arylcoumarin
7-Acetoxy-2-methylisoflavone
8-prenylated eriodictyol
gadelaidic acid
Vestitol
Gancaonin G
Gancaonin H
Licoagrocarpin
Glyasperins M
Glycyrrhiza flavonol A
Licoagroisoflavone
18α-hydroxyglycyrrhetic acid
Odoratin
Phaseol
Xambioona
dehydroglyasperins C
estrone
Diisooctyl succinate
11,14-eicosadienoic acid
(6Z,10E,14E,18E)-2,6,10,15,19,23-hexamethyltetracosa-2,6,10,14,18,22-hexaene
gondoic acid
CLR
Ziziphin_qt
Spinasterol
Machiline
l-SPD
(-)-taxifolin
ent-Epicatechin
Peroxyergosterol
Alisol B
Alisol B monoacetate
alisol,b,23-acetate
16β-methoxyalisol B monoacetate
alisol B
alisol C
alisol C monoacetate
1-Monolinolein
[(1S,3R)-1-[(2R)-3,3-dimethyloxiran-2-yl]-3-[(5R,8S,9S,10S,11S,14R)-11-hydroxy-4,4,8,10,14-pentamethyl-3-oxo-1,2,5,6,7,9,11,12,15,16-decahydrocyclopenta[a]phenanthren-17-yl]butyl] acetate
Cerevisterol
ergosta-7,22E-dien-3beta-ol
(22e,24r)-ergosta-6-en-3beta,5alpha,6beta-triol
(22e,24r)-ergosta-7,22-dien-3-one
ergosta-7,22-diene-3β-ol
5alpha,8alpha-epidioxy-(22e,24r)-ergosta-6,22-dien-3beta-ol
ergosta-7,22-dien-3-one
ergosta-5,7,22-trien-3-ol
polyporusterone E
polyporusterone G
12-senecioyl-2E,8E,10E-atractylentriol
14-acetyl-12-senecioyl-2E,8E,10E-atractylentriol
14-acetyl-12-senecioyl-2E,8Z,10E-atractylentriol
α-Amyrin
(3S,8S,9S,10R,13R,14S,17R)-10,13-dimethyl-17-[(2R,5S)-5-propan-2-yloctan-2-yl]-2,3,4,7,8,9,11,12,14,15,16,17-dodecahydro-1H-cyclopenta[a]phenanthren-3-ol
3β-acetoxyatractylone
8β-ethoxy atractylenolide Ⅲ
(2R)-2-[(3S,5R,10S,13R,14R,16R,17R)-3,16-dihydroxy-4,4,10,13,14-pentamethyl-2,3,5,6,12,15,16,17-octahydro-1H-cyclopenta[a]phenanthren-17-yl]-6-methylhept-5-enoic acid
trametenolic acid
7,9(11)-dehydropachymic acid
(2R)-2-[(3S,5R,10S,13R,14R,16R,17R)-3,16-dihydroxy-4,4,10,13,14-pentamethyl-2,3,5,6,12,15,16,17-octahydro-1H-cyclopenta[a]phenanthren-17-yl]-5-isopropyl-hex-5-enoic acid
Ergosterol peroxide
(2R)-2-[(5R,10S,13R,14R,16R,17R)-16-hydroxy-3-keto-4,4,10,13,14-pentamethyl-1,2,5,6,12,15,16,17-octahydrocyclopenta[a]phenanthren-17-yl]-5-isopropyl-hex-5-enoic acid
3beta-Hydroxy-24-methylene-8-lanostene-21-oic acid
pachymic acid
Poricoic acid A
Poricoic acid B
poricoic acid C
hederagenin
dehydroeburicoic acid
Linoleyl acetate
Baicalin
3,5,6,7-tetramethoxy-2-(3,4,5-trimethoxyphenyl)chromone
Areapillin
Cubebin
Longikaurin A
Octalupine
Sainfuran
Troxerutin
(+)-Anomalin
saikosaponin c_qt
α-spinasterol
petunidin
acacetin
wogonin
(2R)-7-hydroxy-5-methoxy-2-phenylchroman-4-one
baicalein
5,8,2'-Trihydroxy-7-methoxyflavone
5,7,2,5-tetrahydroxy-8,6-dimethoxyflavone
Carthamidin
2,6,2',4'-tetrahydroxy-6'-methoxychaleone
Dihydrobaicalin_qt
Eriodyctiol (flavanone)
Salvigenin
5,2',6'-Trihydroxy-7,8-dimethoxyflavone
5,7,2',6'-Tetrahydroxyflavone
dihydrooroxylin A
Skullcapflavone II
oroxylin a
Panicolin
5,7,4'-Trihydroxy-8-methoxyflavone
NEOBAICALEIN
DIHYDROOROXYLIN
Norwogonin
5,2'-Dihydroxy-6,7,8-trimethoxyflavone
coptisine
bis[(2S)-2-ethylhexyl] benzene-1,2-dicarboxylate
Diop
epiberberine
Moslosooflavone
11,13-Eicosadienoic acid, methyl ester
5,7,4'-trihydroxy-6-methoxyflavanone
5,7,4'-trihydroxy-8-methoxyflavanone
rivularin
Cavidine
coniferin
10,13-eicosadienoic
12,13-epoxy-9-hydroxynonadeca-7,10-dienoic acid
(3S,6S)-3-(benzyl)-6-(4-hydroxybenzyl)piperazine-2,5-quinone
Cycloartenol
beta-D-Ribofuranoside, xanthine-9
6-methylgingediacetate2
Dihydrocapsaicin
16beta,17-dihydroxy-(-)-kauran-19-ate-beta-D-glucose ester_qt
astin C
astin D
(13S)-13-[(4-o-acetyl-6-deoxy-alpha-l-mannopyranosyl)oxy]-labda-8(20),14-diene
[(2S,3R,4R,5R,6S)-2-[(1S)-1-[2-[(1S,4aS,8aS)-5,5,8a-trimethyl-2-methylene-decalin-1-yl]ethyl]-1-methyl-prop-2-enoxy]-4,5-dihydroxy-6-methyl-tetrahydropyran-3-yl] acetate
(13S)-13-[(2,4-di-o-acetyl-6-deoxy-alpha-l-mannopyr-anosyl)oxy]labda-8(20),14-diene
rabdosinatol
shionone
shionoside C
galangin
ZINC03978781
epifriedelanol acetate
5,7-dihydroxy-2-(3-hydroxy-4-methoxyphenyl)chroman-4-one
7beta-angeloyloxyoplopa-3(14)Z,8(10)-dien-2-one
7beta-(4-methylsenecioyloxy)oplopa-3(14)E,8(10)-dien-2-one
7beta-senecioyloxyoplopa-3(14)Z,8(10)-dien-2-one
la-7beta-di(4-methulsenecioyloxy) oplopa-3(14)Z,8(10)-dien-2-one
(1R,3R,4R,5S,6S)-1-acetoxy-8-angeloxoyloxy-3,4-epoxy-5-hydroxybisabola-7(14),10-dien-2-one
14-acetoxy-7beta-(3-ethyl-cis-crotonoyloxy)-1alpha-(2-methyl butyryloxy)-notonipetranone
7beta-(3-ethyl-cis-crotonoyloxy)-14-hydroxy-notonipetranone
14-acetoxy-7beta-angeloyloxy-notonipetranone
14-acetoxy-7beta-senecioyloxy-notonipetranone
7beta-(3-ethyl-cis-crotonoyloxy)-la-(2-methyl butyryloxy)-3,14-dehydro-Z-notonipetralactone
senkirkine
taraxanthin
tussilagolactone
tussilagin
alpha-Carotene-5,6-epoxide
Femara
methyl 3-o-caffeoylquinate
Methyl butyric acid tussilagin ester
gallic acid-3-O-(6'-O-galloyl)-glucoside
isovitexin
Dinatin
Rhamnazin
anhydrobelachinal
ardisianone A
belachinal
belamcandal
dihydrokaempferide
epianhydrobelachinal
iristectorene B
Iristectorigenin (9CI)
Iristectorigenin A
Irolone
Mangiferolic acid
4,9-dimethoxy-1-vinyl-$b-carboline
Caribine
Cryptopin
sesamin
[(1S)-3-[(E)-but-2-enyl]-2-methyl-4-oxo-1-cyclopent-2-enyl] (1R,3R)-3-[(E)-3-methoxy-2-methyl-3-oxoprop-1-enyl]-2,2-dimethylcyclopropane-1-carboxylate
(3S)-7-hydroxy-3-(2,3,4-trimethoxyphenyl)chroman-4-one
ZINC05223929
piperlonguminine
Denudatin B
Kadsurenone
hancinol
hancinone C
24-Methylcholest-5-enyl-3belta-O-glucopyranoside_qt
campesterol
Isofucosterol
Dioscoreside C_qt
diosgenin
Doradexanthin
Methylcimicifugoside_qt
AIDS180907
poncirin
Isosinensetin
5,7,4'-Trimethylapigenin
isosakuranetin-7-rutinoside
Prangenin
prangenin hydrate
poncimarin
isoponcimarin
6-Methoxy aurapten
citrusin B
neohesperidin_qt
Sinensetin
Ammidin
Obacunone
nobiletin
didymin
Tetramethoxyluteolin
4-[(2S,3R)-5-[(E)-3-hydroxyprop-1-enyl]-7-methoxy-3-methylol-2,3-dihydrobenzofuran-2-yl]-2-methoxy-phenol
Citromitin
patchoulan 1,12-diol
pachypodol
5-Hydroxy-7,4'-dimethoxyflavanon
irisolidone
phenanthrone
quercetin 7-O-β-D-glucoside
Acanthoside B
3,23-dihydroxy-12-oleanen-28-oic acid
